# Supplementary material
Source: publisher figshare collection journal article supplement (https://rs.figshare.com/ndownloader/files/14651381)
Supplement: Supplementary file 1 [file 14651381]

**
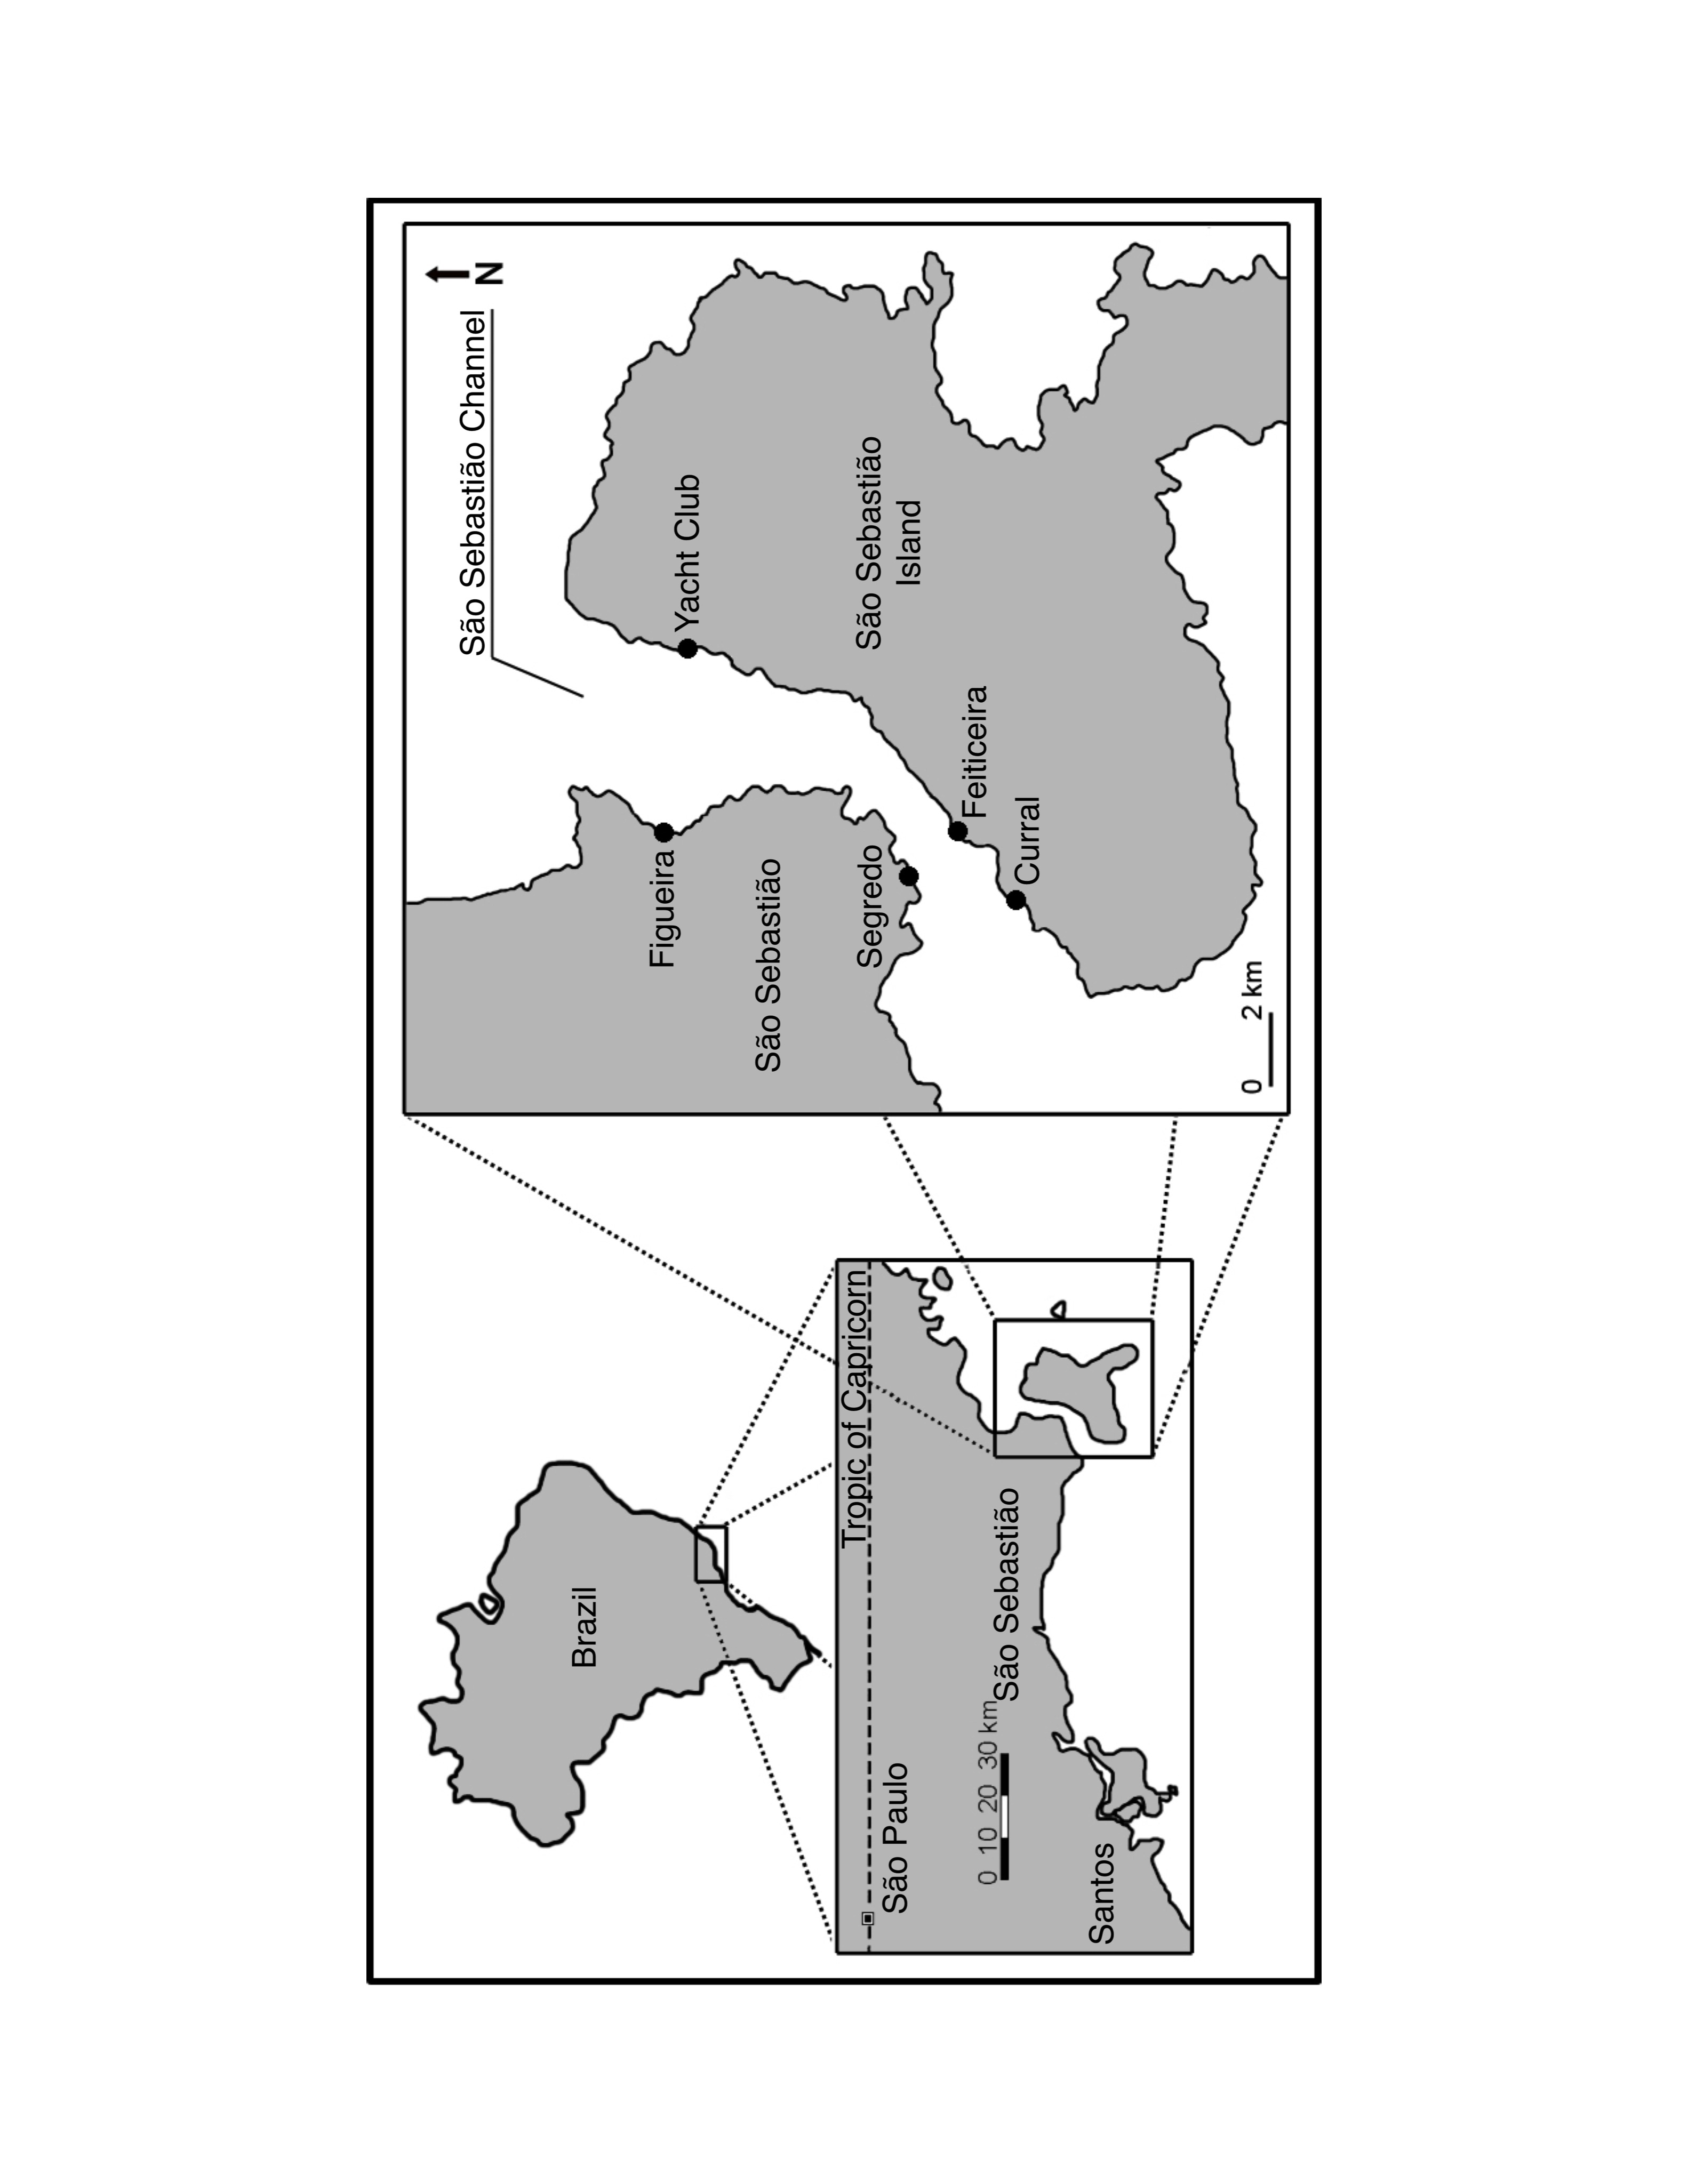
Electronic Supplementary Material**

**ESM File 1:**

- **Title:** Supplementary Figure 1: Map of SE Brazil Study Locations
- **Legend:** Experimental panels were deployed at Yacht Club docks (23°46'29''S, 45°21'25''W), piers at Feiticeria (23°50'43''S, 45°24'40''W), Curral (23°52'2''S, 45°26'2''W), and Figueira (23°53'3'' S, 45°16'48''W), and an artificial mooring at Segredo (23°49'44''S, 45°25'24''W).

**ESM File 2:**

- **Title:** Supplementary Figure 2: Experimental design of experiment to manipulate predation and competition.
- **Legend:** (A) Schematic of experimental panels in predation and competition treatments showing 4 replicate panels per treatment. (B) Photo showing closed cage panels (left) and open cage panels (right). (C) Example to indicate how pieces of colony are attached to centre of panel by two cable ties. (D) Example to indicate how a cluster of connected zooids is attached to the centre of a panel with cable ties. (E). Example to indicate how juvenile solitary species were attached to a panel.

**ESM File 3:**

- **Title:** Supplementary Figure 3: Relationship between ascidian dry weight and area
- **Legend:** Lines of best fit and R2 values indicating strength of relationship between dry mass and area of: (A) *Clavelina oblonga*. (B) *Polyandrocarpa zorritensis*. (C) *Polyclinum constellatum*. (D) *Aplidium accarense*. (E) *Didemnum galacteum*. (F) *Botrylloides nigrum*. (G) *Styela plicata*. (H) *Herdmania pallida*.


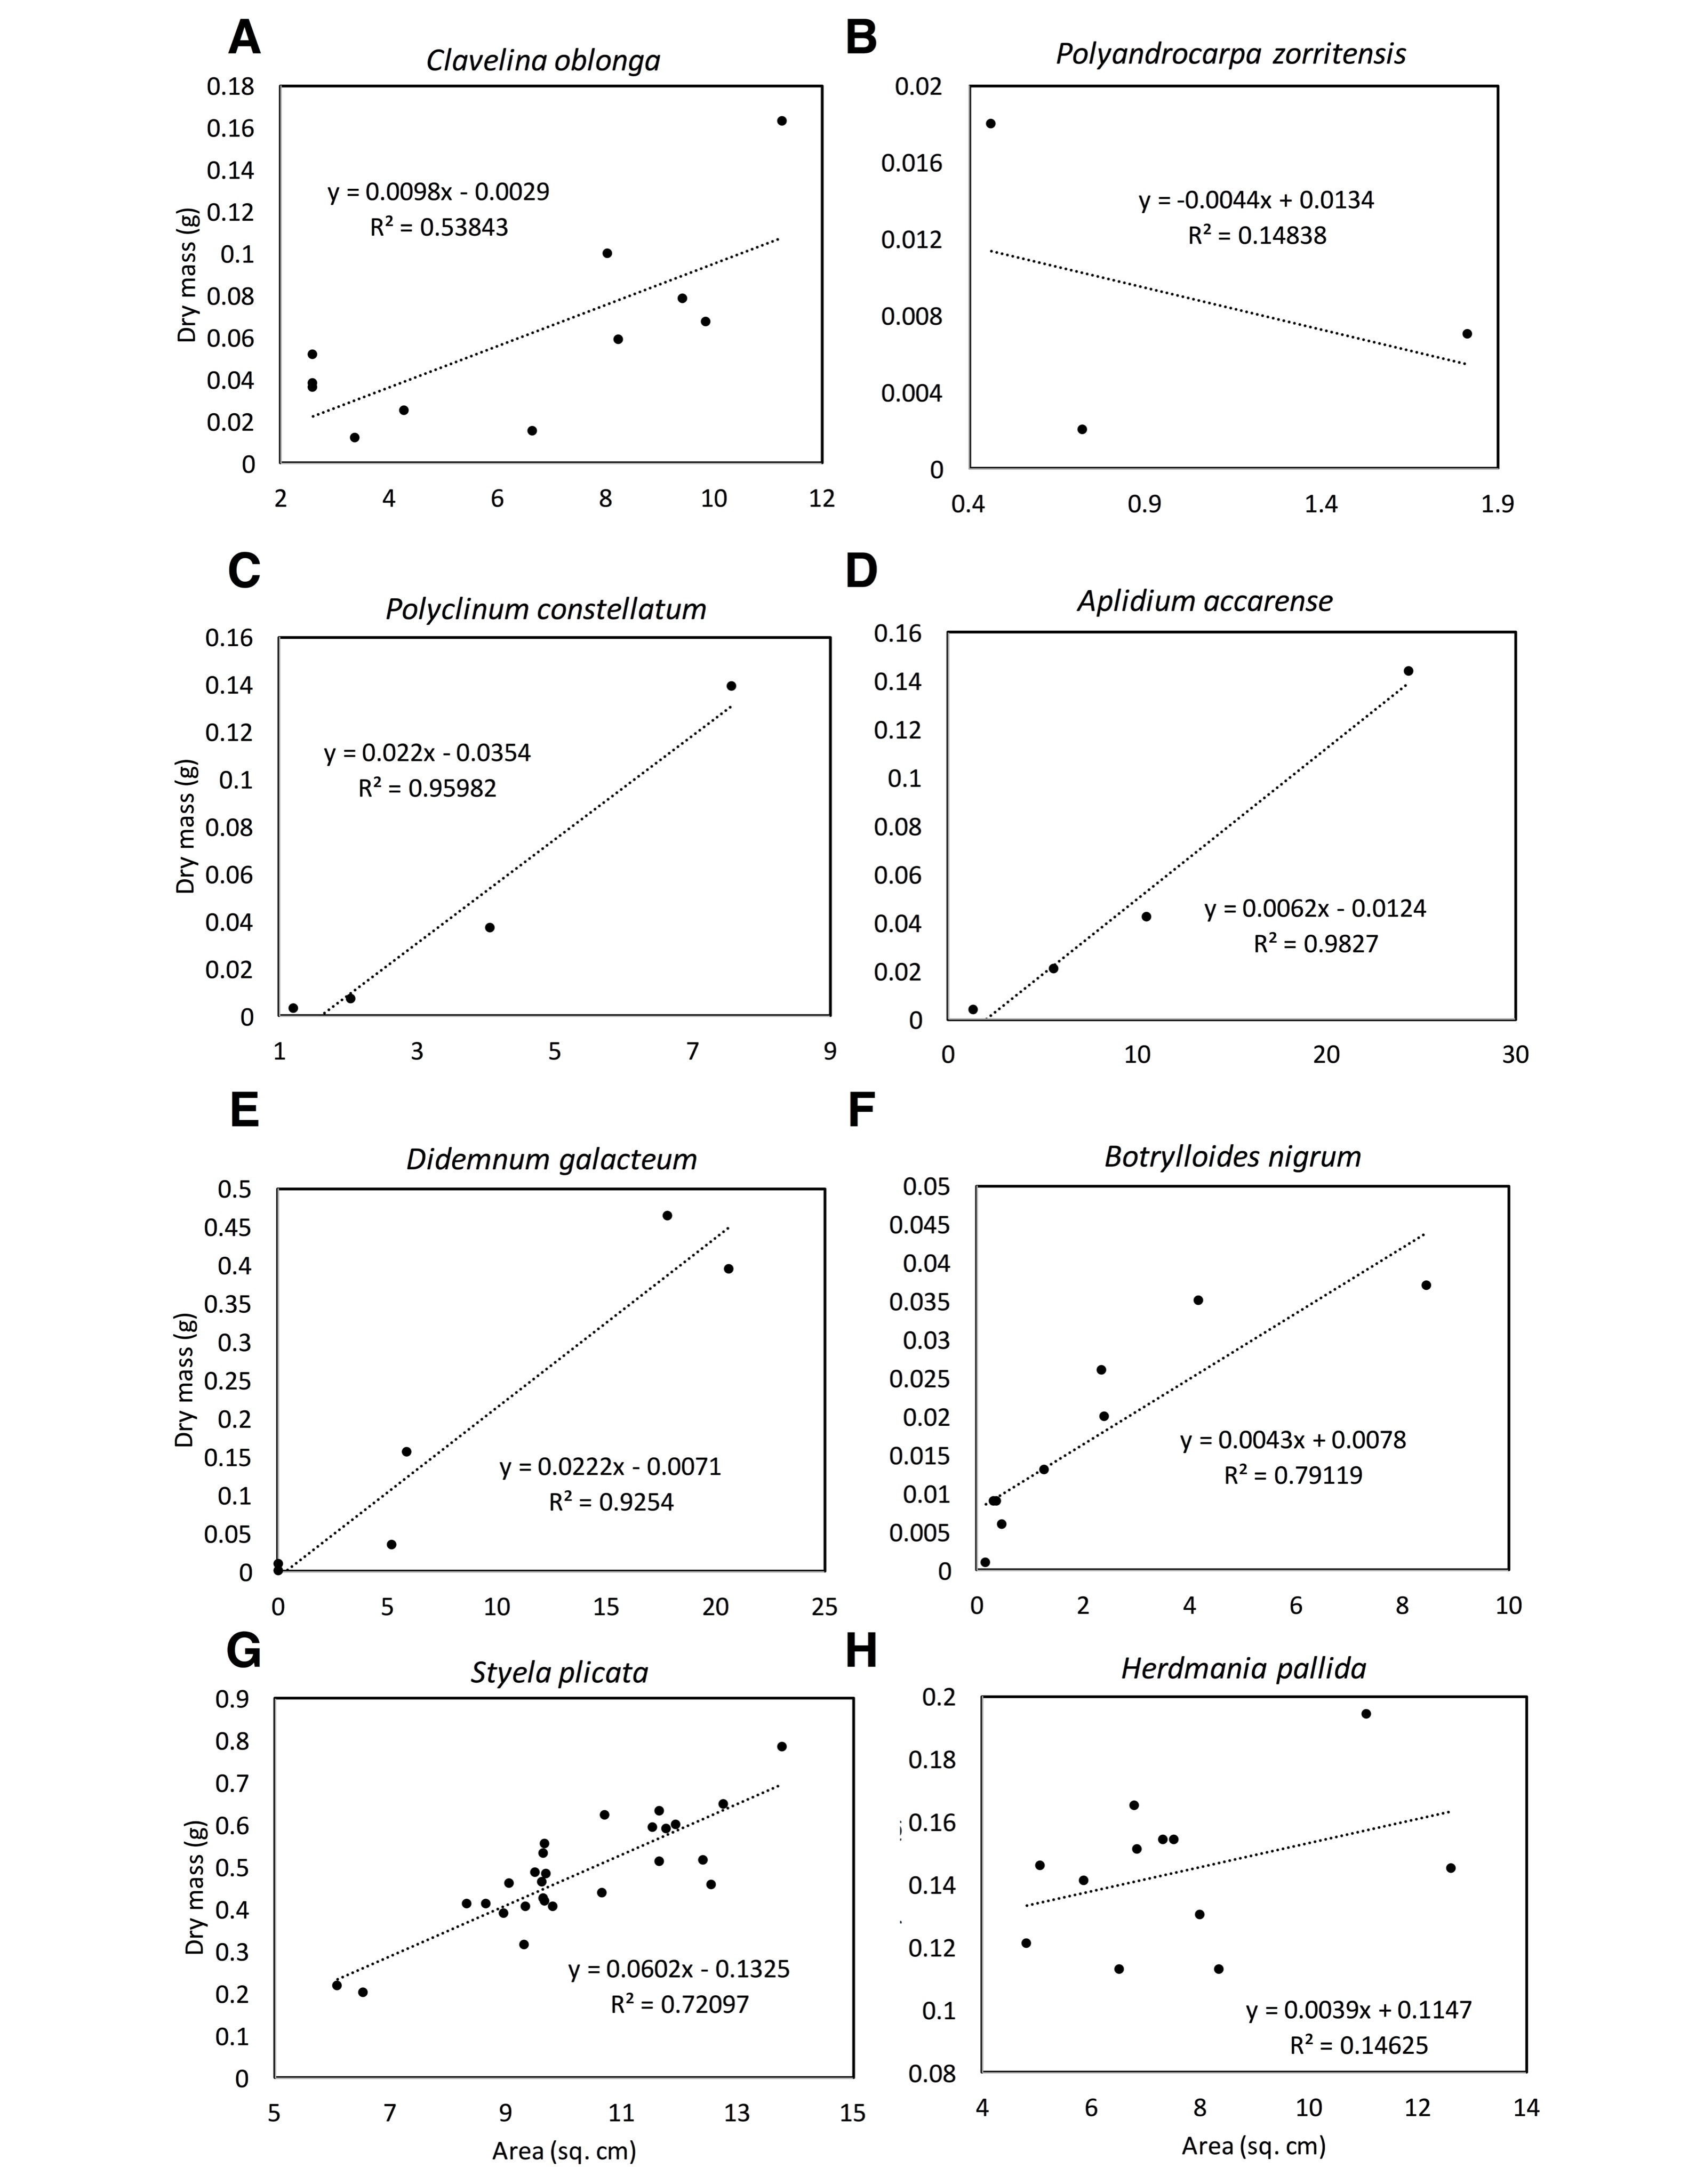


**ESM File 5:**

**Supplementary Table 1: Repeated measures Analysis of Variance (RM-ANOVA) comparing the coverage and richness of colonial and solitary life forms in 2007 over 180 days at Segredo. Bold p-values stand for significant effects. Mauchly's Test of Sphericity indicated that the assumption of sphericity had been violated, (coverage: W= 0.002, *p* < 0.05; richness: W= 0.182, *p* < 0.05) thus Greenhouse–Geisser corrections were applied (coverage: ε = 0.369, richness: ε = 0.621).**

|  |  | Coverage | | | |  | Richness | | |
| --- | --- | --- | --- | --- | --- | --- | --- | --- | --- |
| Source |  | Df | Mean Sq | F value | p |  | Mean Sq | F value | p |
| Between subjects |  |  |  |  |  |  |  |  |  |
| Life Form |  | 1 | 55555 | 466.30 | **<0.001** |  | 144.50 | 42.57 | **<0.001** |
| Error |  | 10 | 119 |  |  |  | 3.39 |  |  |
| Within subjects |  |  |  |  |  |  |  |  |  |
| Time |  | 5 | 266 | 1.46 | 0.218 |  | 3.88 | 2.49 | **0.043** |
| Life Form X Time |  | 5 | 8272 | 45.55 | **<0.001** |  | 19.97 | 12.79 | **<0.001** |
| Error |  | 50 | 182 |  |  |  | 1.56 |  |  |

**ESM File 6:**

**Supplementary Table 2: Multifactorial Analysis of Variance (ANOVA) comparing the coverage and richness of colonial and solitary life forms in 2010 after 30 and 100 days at Feiticeira, Figueira, YCI, and 30 days only at Curral. Bold p-values stand for significant effects.**

|  |  | Coverage | | | |  | Richness | | |  |
| --- | --- | --- | --- | --- | --- | --- | --- | --- | --- | --- |
| Source |  | Df | Mean Sq | F value | p |  | Mean Sq | F value | p |  |
| Feiticeira |  |  |  |  |  |  |  |  |  |  |
| Life Form |  | 1 | 31360 | 115.62 | **<0.001** |  | 213.14 | 131.12 | **<0.001** |  |
| Time |  | 1 | 7710 | 28.43 | **<0.001** |  | 17.34 | 10.67 | **0.002** |  |
| Life Form X Time |  | 1 | 78 | 0.29 | 0.593 |  | 0.07 | 0.04 | 0.837 |  |
| Error |  | 56 | 271 |  |  |  | 1.625 |  |  |  |
| Figueira |  |  |  |  |  |  |  |  |  |  |
| Life Form |  | 1 | 97516 | 1251.66 | **<0.001** |  | 366.03 | 410.63 | **<0.001** |  |
| Time |  | 1 | 81 | 1.04 | 0.312 |  | 4.23 | 4.74 | **0.034** |  |
| Life Form X Time |  | 1 | 189 | 2.43 | 0.125 |  | 0.03 | 0.03 | 0.868 |  |
| Error |  | 56 | 78 |  |  |  | 0.89 |  |  |  |
| YCI |  |  |  |  |  |  |  |  |  |  |
| Life Form |  | 1 | 52853 | 234.21 | **<0.001** |  | 411.74 | 159.78 | **<0.001** |  |
| Time |  | 1 | 1841 | 8.16 | **0.006** |  | 18.23 | 7.07 | **0.010** |  |
| Life Form X Time |  | 1 | 84 | 0.37 | 0.544 |  | 2.34 | 0.91 | 0.345 |  |
| Error |  | 56 | 226 |  |  |  | 2.58 |  |  |  |
| Curral |  |  |  |  |  |  |  |  |  |  |
| Life Form |  | 1 | 3384 | 24.29 | **<0.001** |  |  |  |  |  |
| Error |  | 22 | 139 |  |  |  |  |  |  |  |

**ESM File 7:**

**Supplementary Table 3. Analysis of deviance for loglinear model fitted on cell frequencies of ascidians, where Colo = colonial form (YES:NO), Comp = competition (YES:NO), Pred = predation (YES:NO), Surv = survived (YES:NO).**

|  | **Df** | **Deviance** | **Residual Df** | **Residual Deviance** | **P (Chi)** |
| --- | --- | --- | --- | --- | --- |
| **NULL** |  |  | 15 | 65.298 |  |
| **Colo** | 1 | 15.412 | 14 | 49.886 | **<0.001** |
| **Comp** | 1 | 0.063 | 13 | 49.823 | 0.801 |
| **Pred** | 1 | 0.016 | 12 | 49.807 | 0.899 |
| **Surv** | 1 | 34.376 | 11 | 15.430 | **<0.001** |
| **Colo:Comp** | 1 | 0.004 | 10 | 15.426 | 0.947 |
| **Colo:Pred** | 1 | 0.052 | 9 | 15.374 | 0.819 |
| **Colo:Surv** | 1 | 0.002 | 8 | 15.372 | 0.964 |
| **Comp:Pred** | 1 | 0.017 | 7 | 15.355 | 0.897 |
| **Comp:Surv** | 1 | 0.509 | 6 | 14.846 | 0.476 |
| **Pred:Surv** | 1 | 2.961 | 5 | 11.886 | 0.085 |
| **Colo:Comp:Pred** | 1 | 0.054 | 4 | 11.832 | 0.816 |
| **Colo:Comp:Surv** | 1 | 0.005 | 3 | 11.827 | 0.945 |
| **Colo:Pred:Surv** | 1 | 9.777 | 2 | 2.050 | **0.002** |
| **Comp:Pred:Surv** | 1 | 0.295 | 1 | 1.755 | 0.587 |

**ESM File 8:**

**Supplementary Table 4: Repeated measures Analysis of Variance (RM-ANOVA) comparing growth between colonial and solitary life forms and ecological treatments. Bold p-values stand for significant effects. Mauchly's Test of Sphericity indicated that the assumption of sphericity had been violated, W= 0.3398, *p* < 0.05, thus Greenhouse–Geisser corrections were applied (ε = 0.6585).**

| Source | Df | Mean Sq | F value | p |
| --- | --- | --- | --- | --- |
| Between subjects |  |  |  |  |
| Life Form | 1 | 0.01 | 0.00 | 0.948 |
| Predation | 1 | 11.61 | 4.78 | **0.031** |
| Competition | 1 | 1.53 | 0.63 | 0.429 |
| Life Form X Predation | 1 | 10.49 | 4.32 | **0.041** |
| Life Form X Competition | 1 | 0.09 | 0.04 | 0.848 |
| Predation X Competition | 1 | 0.02 | 0.01 | 0.937 |
| Life Form X Predation X Competition | 1 | 0.67 | 0.28 | 0.600 |
| Error | 79 | 2.43 |  |  |
| Within subjects |  |  |  |  |
| Time | 4 | 0.36 | 0.76 | 0.554 |
| Life Form X Time | 4 | 0.04 | 0.08 | 0.987 |
| Predation X Time | 4 | 6.69 | 14.11 | **<0.001** |
| Competition X Time | 4 | 0.60 | 1.27 | 0.283 |
| Life Form X Predation X Time | 4 | 1.70 | 3.59 | **0.007** |
| Life Form X Competition X Time | 4 | 0.25 | 0.52 | 0.722 |
| Predation X Competition X Time | 4 | 0.82 | 1.73 | 0.144 |
| Life Form X Predation X Competition X Time | 4 | 0.82 | 1.73 | 0.143 |
| Error | 316 | 0.47 |  |  |
